# Supplementary material for: Seed and peel essential oils obtained from Campomanesia adamantium fruit inhibit inflammatory and pain parameters in rodents
Source: PubMed Central journal article supplement (PMC5319778; doi:10.1371/journal.pone.0157107), 2017-02-21

### Cumene

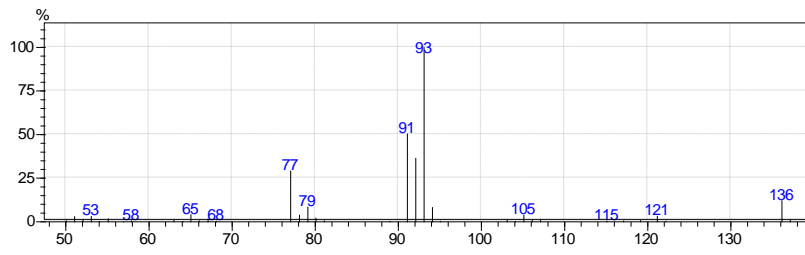

### $\alpha$ -Pinene

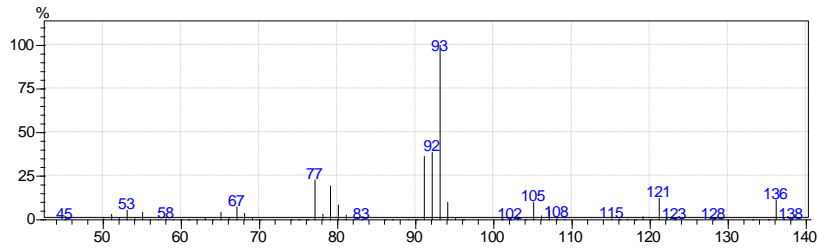

### Camphene

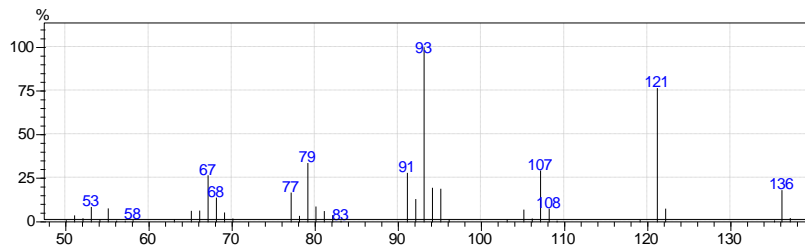

### $\beta$ -Pinene

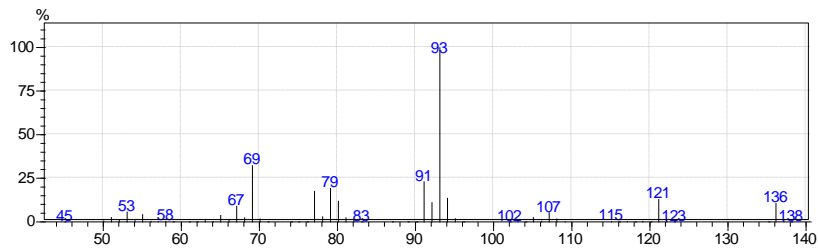

### Myrcene

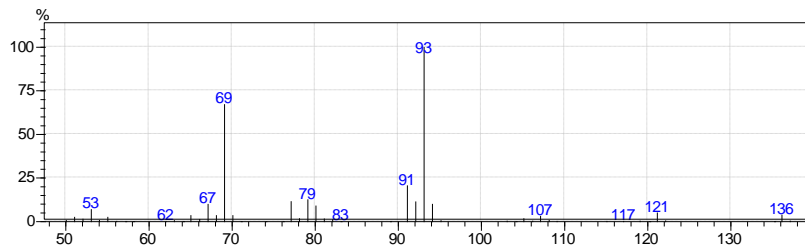

$\alpha$ -Phellandrene

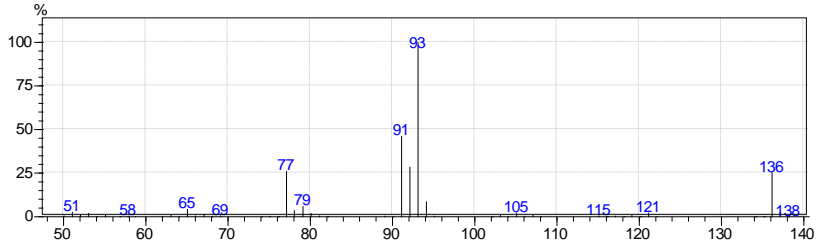

$\delta$ -Carene

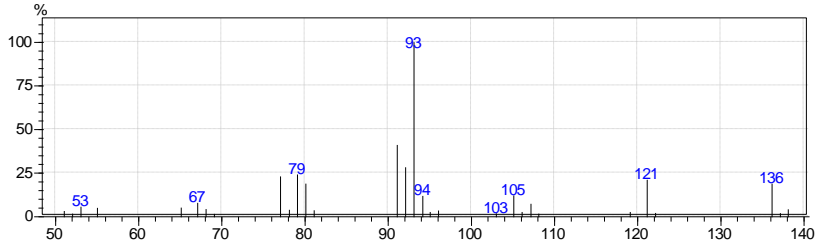

$\alpha$ -Terpinene

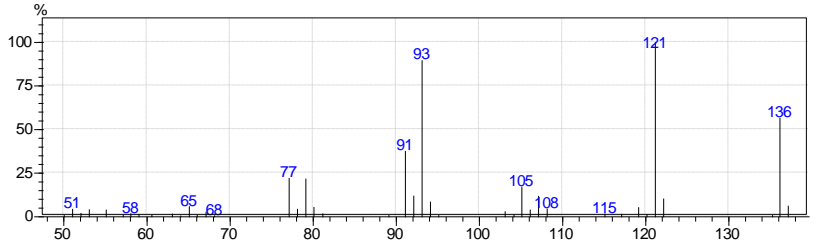

o-Cymene

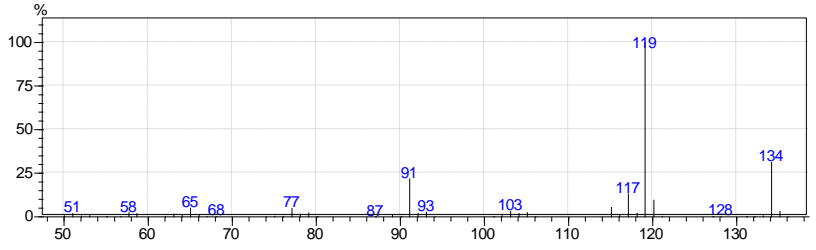

Limonene

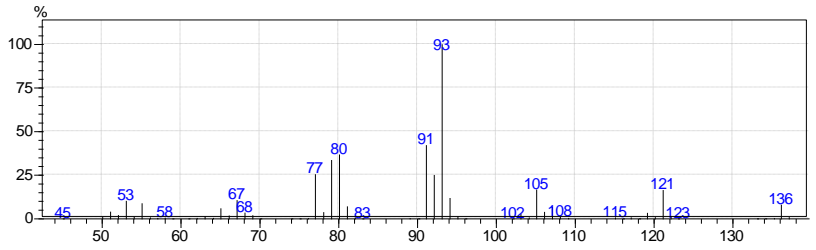

### 1.8-Cineole

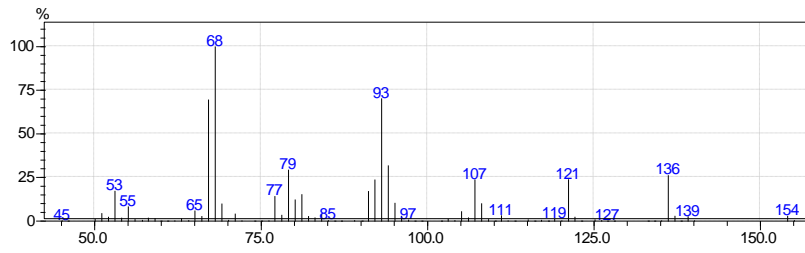

### Z- $\beta$ -Ocimene

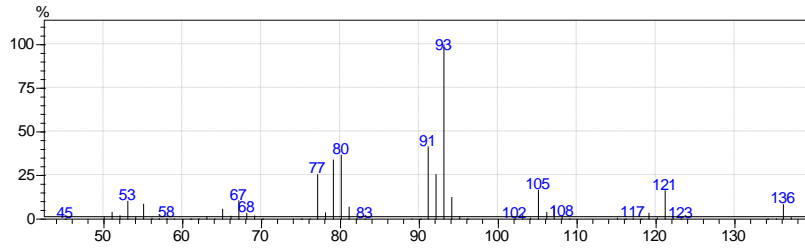

### E- $\beta$ -Ocimene

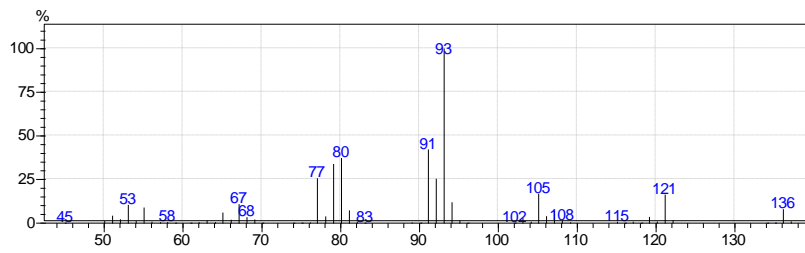

### $\Upsilon$ -Terpinene

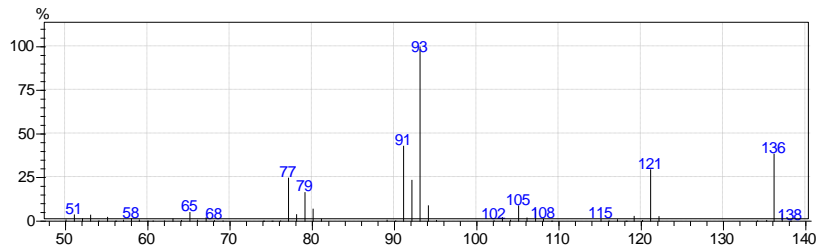

### Terpinolene

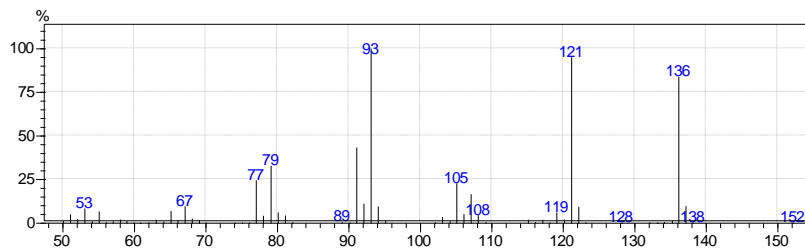

### Linalool

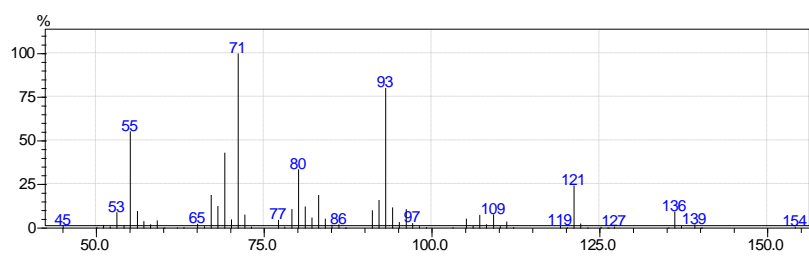

### endo-Fenchol

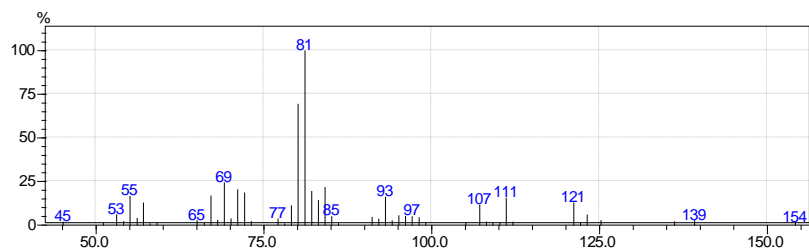

### Borneol

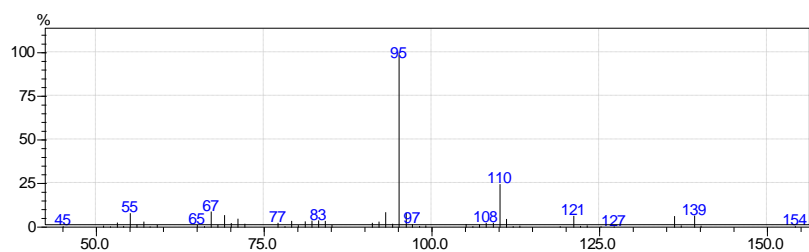

### Terpinen-4-ol

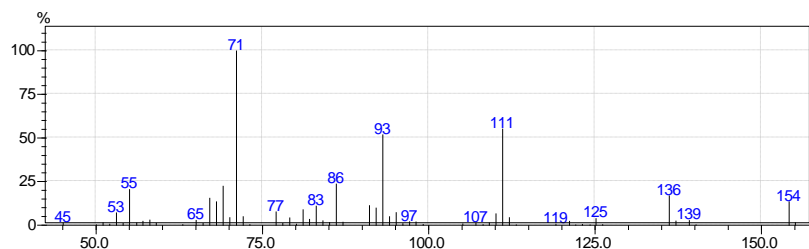

### $\alpha$ -Terpineol

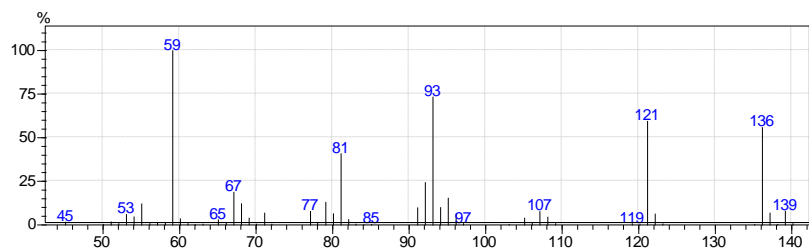

### Myrtenal

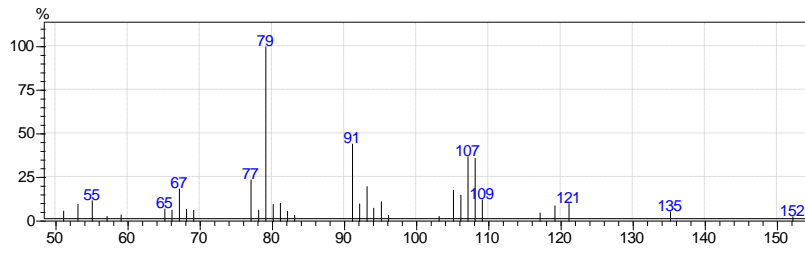

### trans-Piperitol

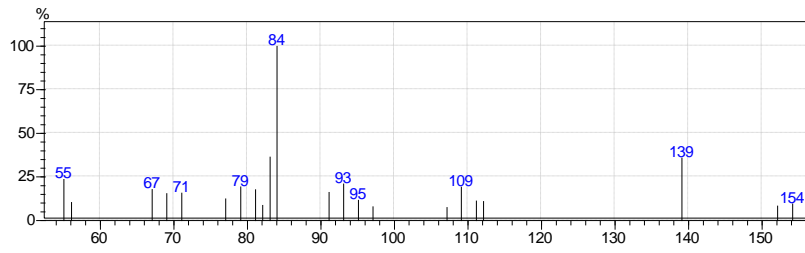

### trans-Carveol

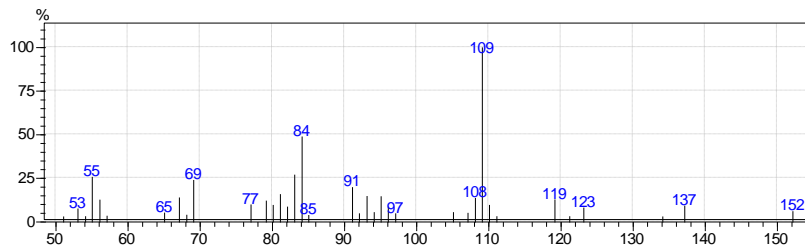

### Nerol

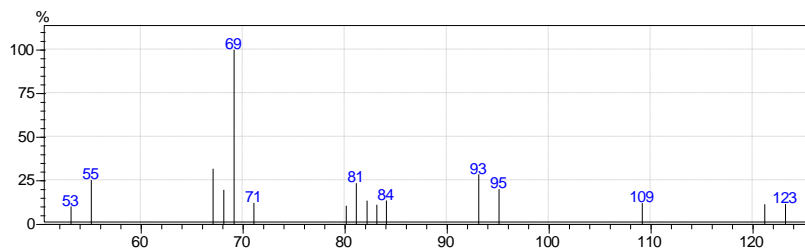

### Carvone

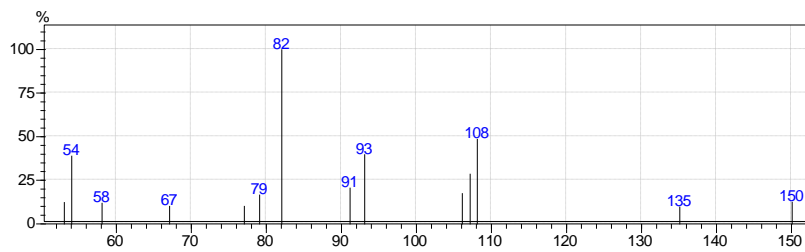

Geraniol

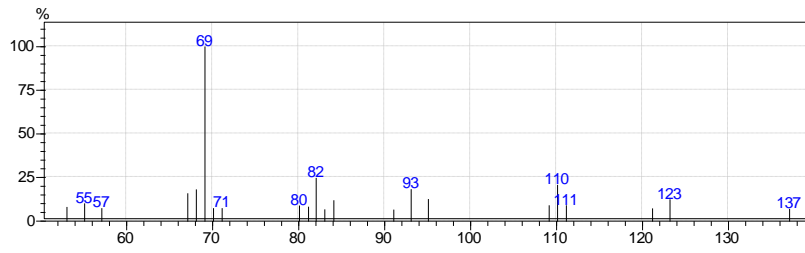

Perilla aldehyde

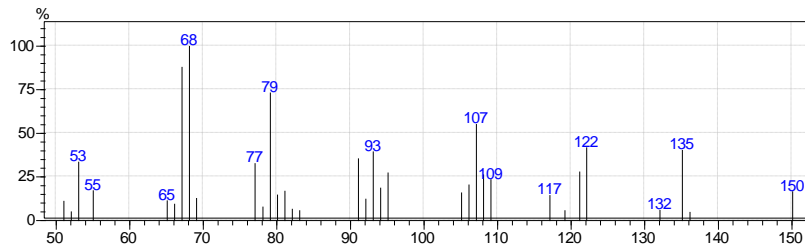

Carvacrol

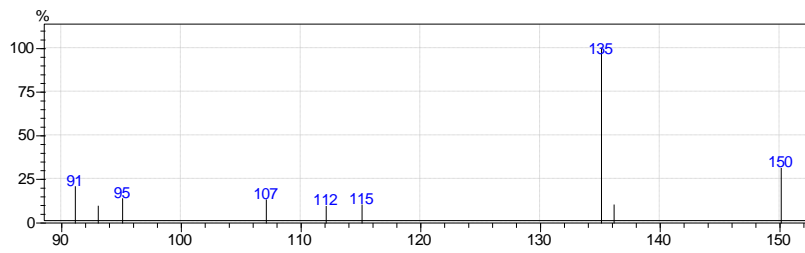

Methyl geranate

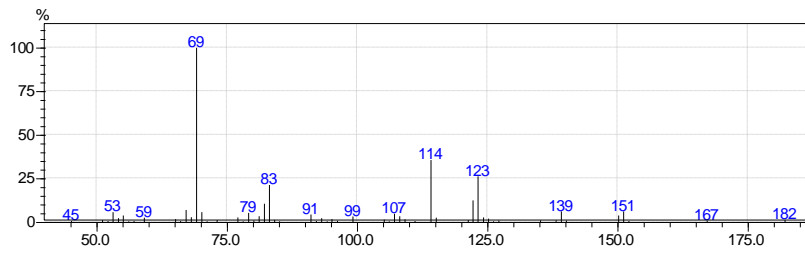

$\delta$ -Elemene

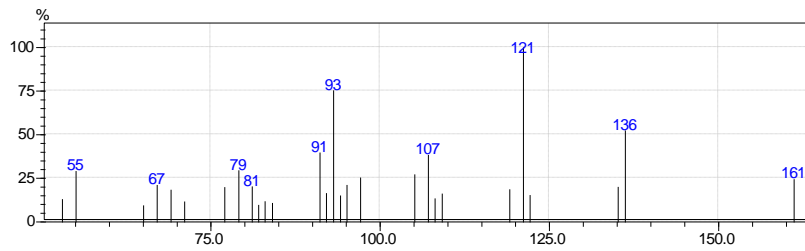

$\alpha$ -Ylangene

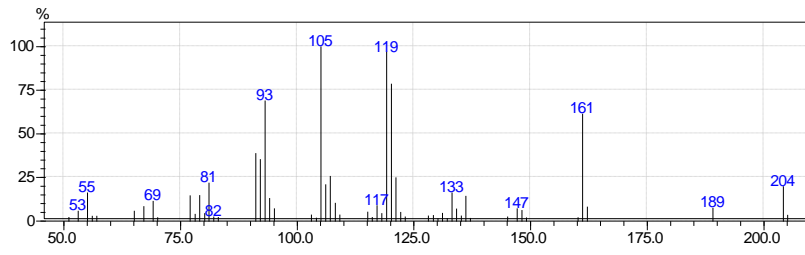

$\alpha$ -Copaene

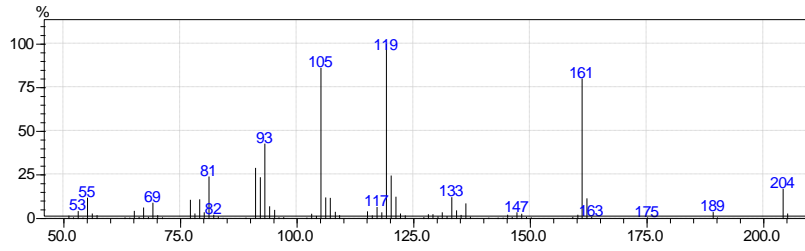

Isoledene

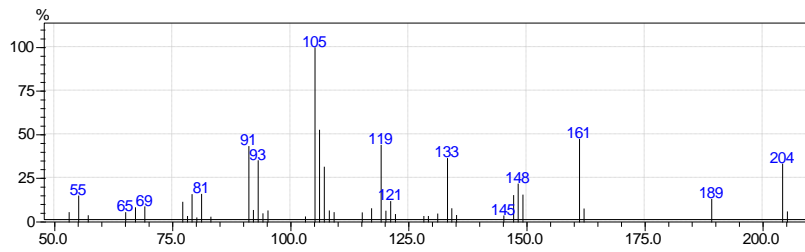

$\beta$ -Cubebene

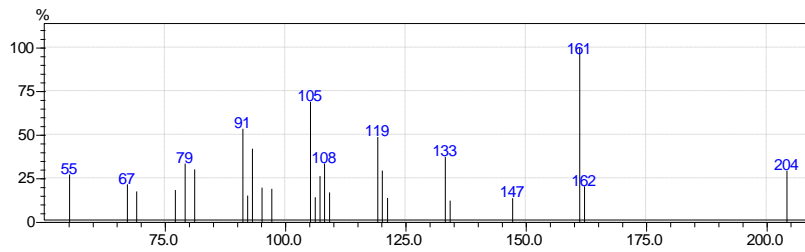

$\beta$ -Elemene

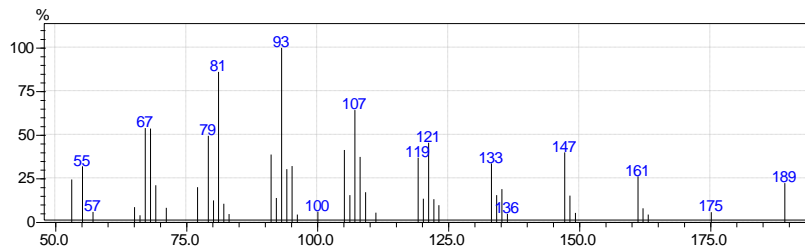

### Sibirene

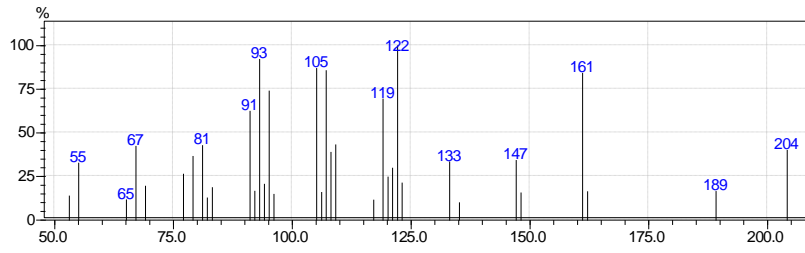

### $\alpha$ -Gurjunene

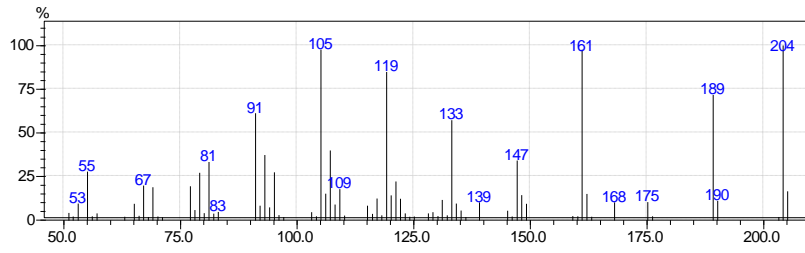

### Thujopsene

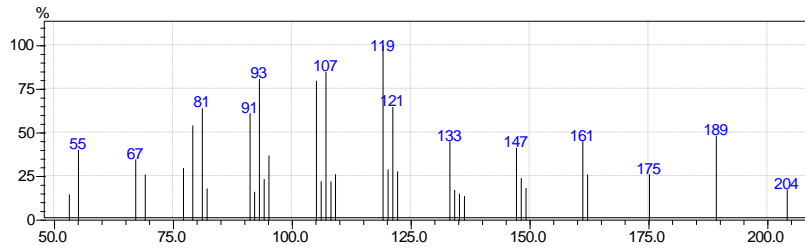

### $\beta$ -Copaene

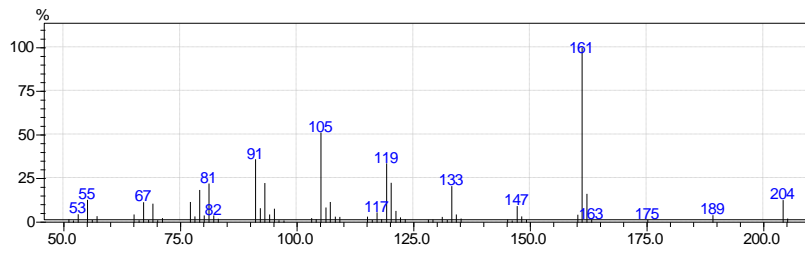

### Aromadendrene

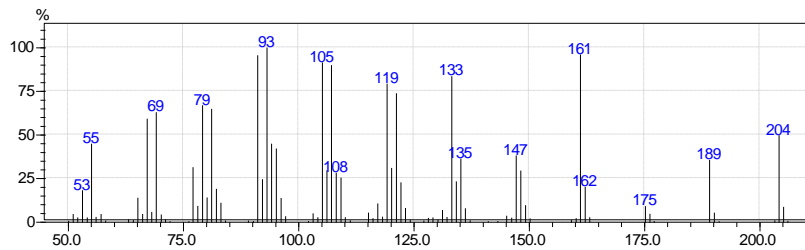



trans-muurola-3,5-diene

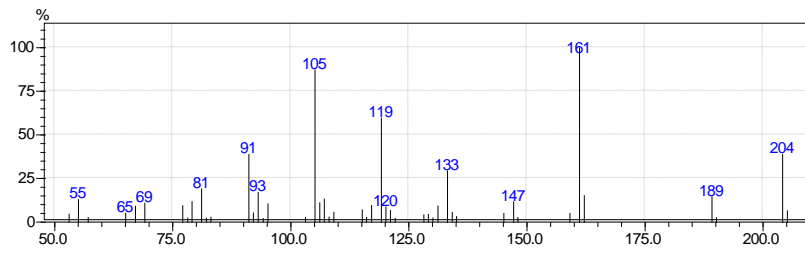

$\alpha$ -Humulene

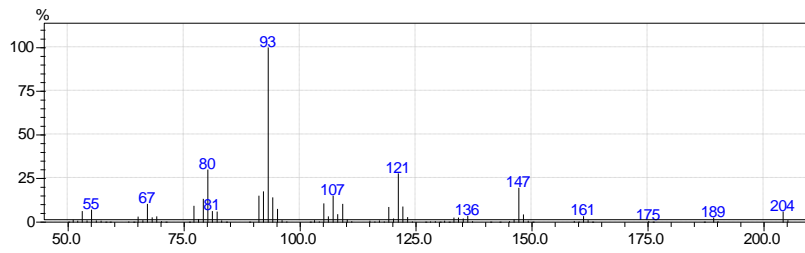

allo-Aromadendrene

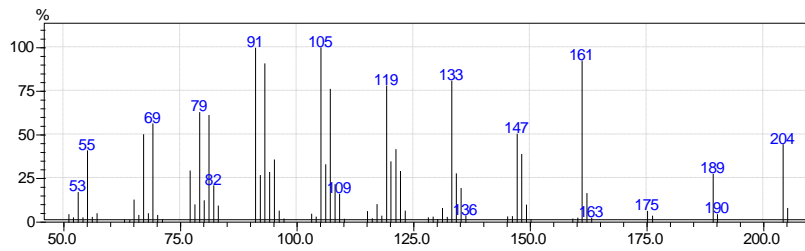

Cedrane

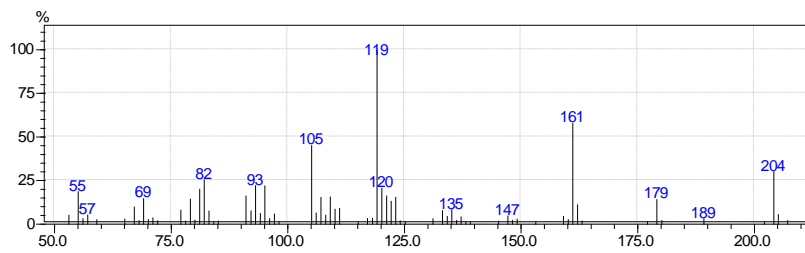

trans-Cadina-1(6),4-diene

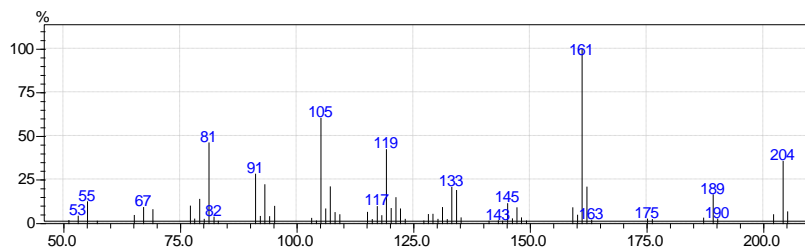

### γ-Muurolene

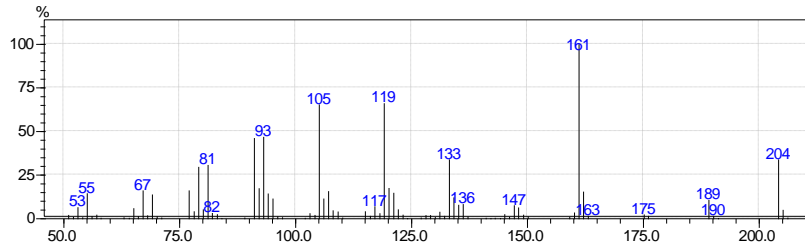

### Germacrene D

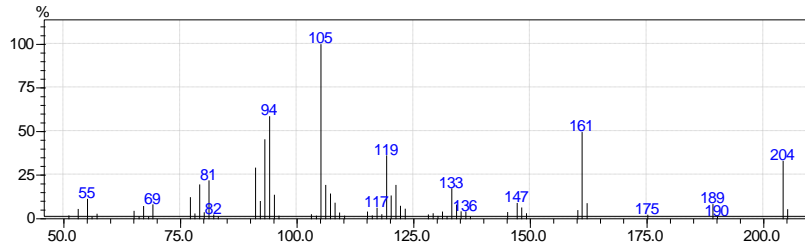

### Widdra-2,4(14)-diene

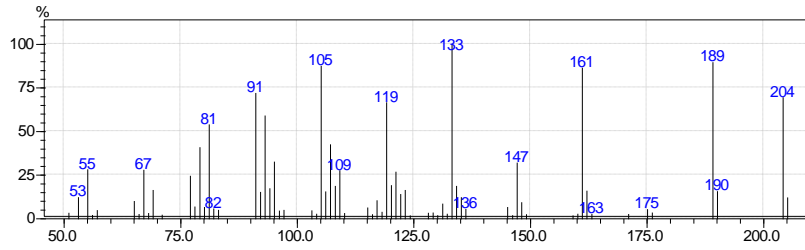

### α-Amorphene

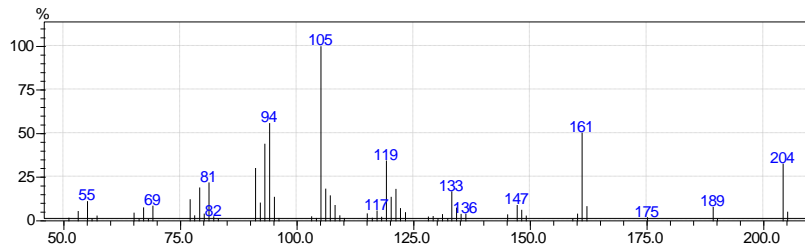

### β-Guaiene

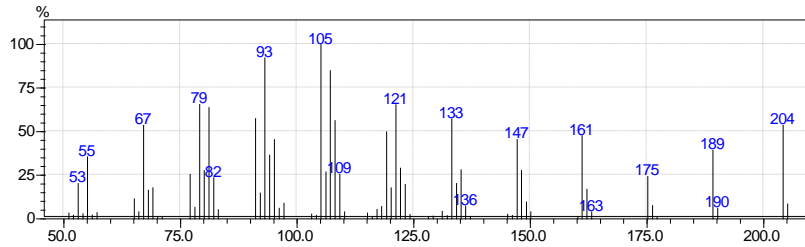

### Bicylogermacrene

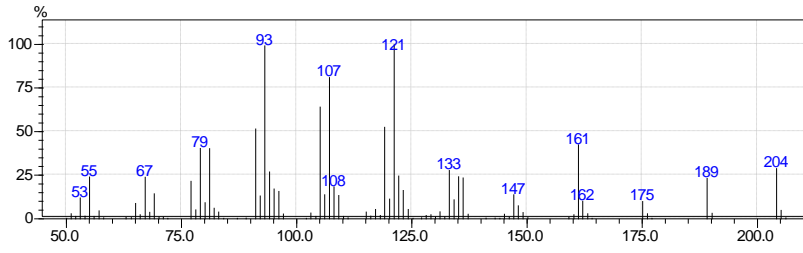

### $\alpha$ -Muurolene

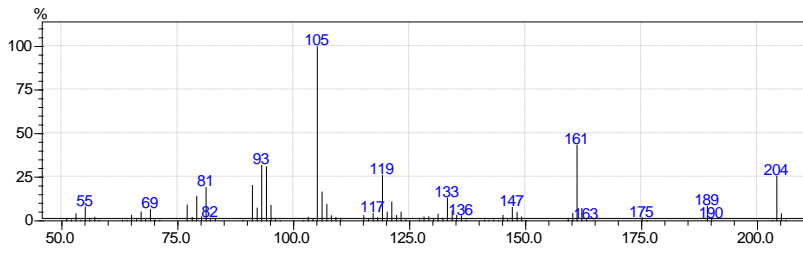

### $\delta$ -Amorphene

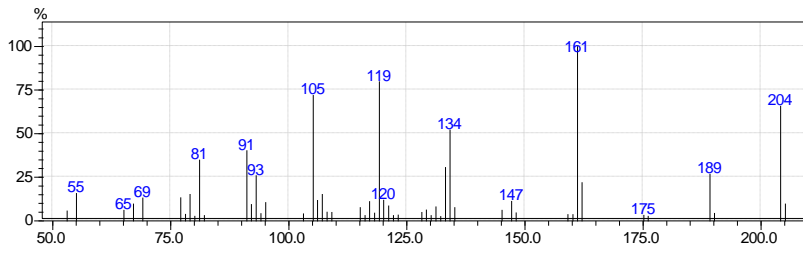

### $\gamma$ -Cadinene

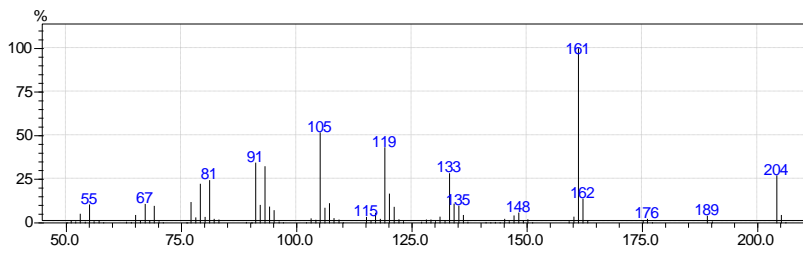

### $\delta$ -Cadinene

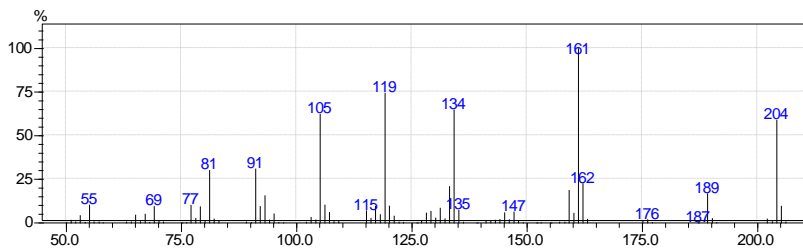

Trans-Cadina-1,4-diene

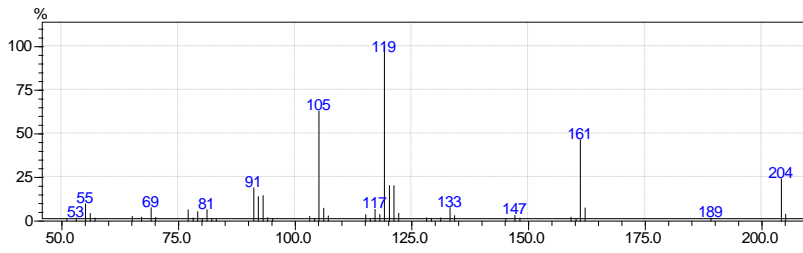

$\alpha$ -Cadinene

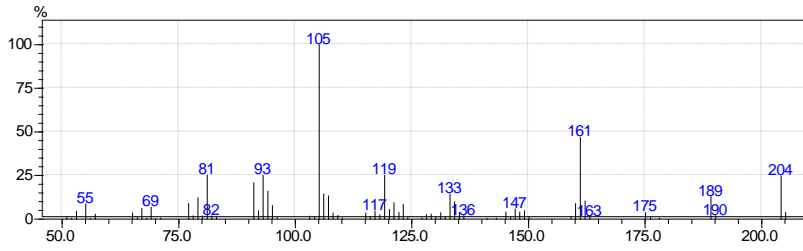

Selina-3,7(11)-diene

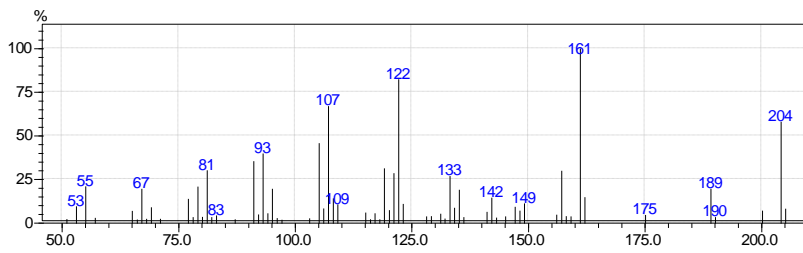

Germacrene B

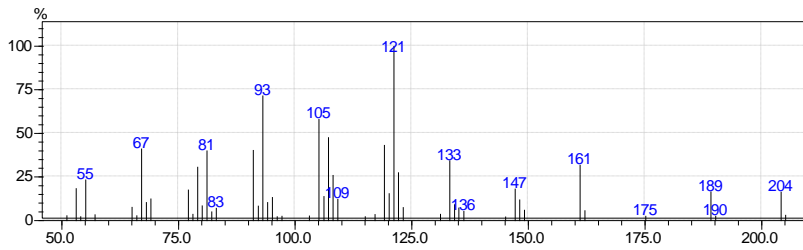

Nerolidol

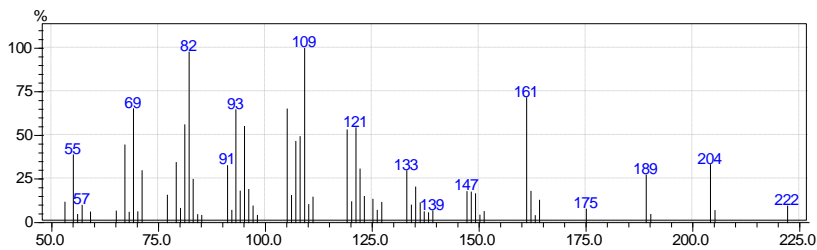

### Palustrol

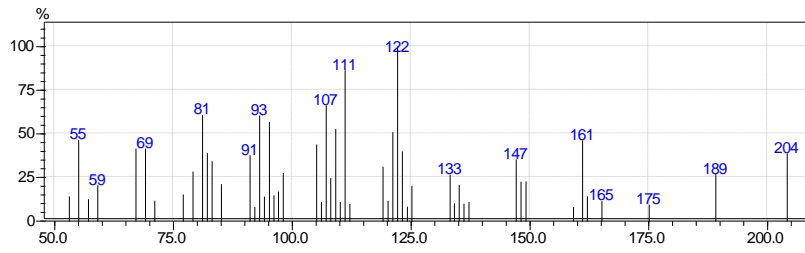

### Spathulenol

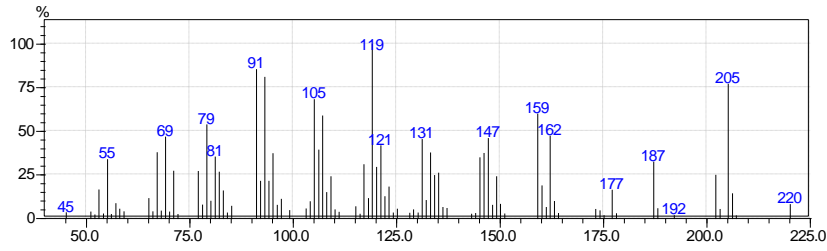

### Globulol

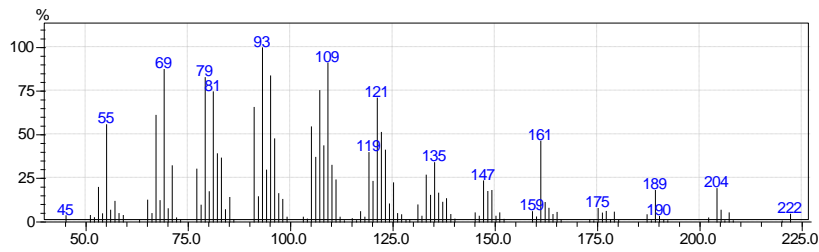

### Cubeban-11-ol

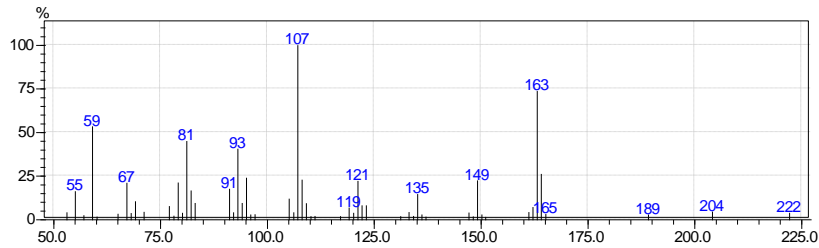

### Guaiol

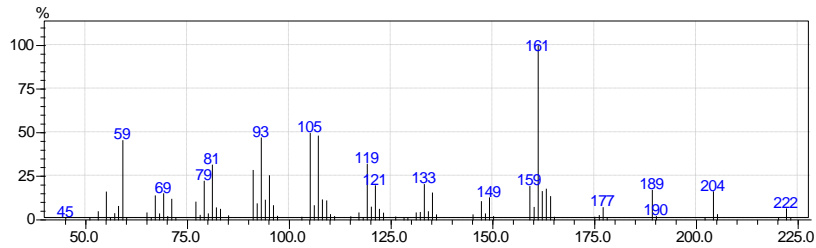

### $\alpha$ -Atlantol (humulene epóxi II)

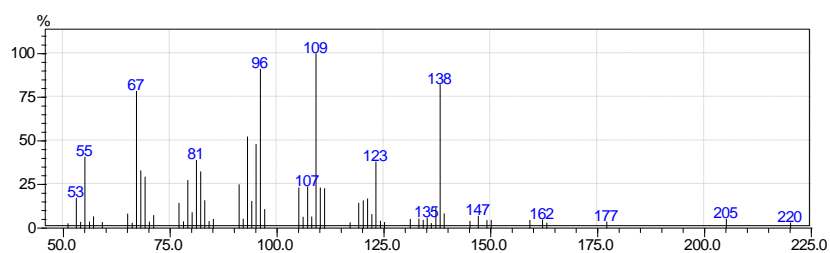

### Junenol

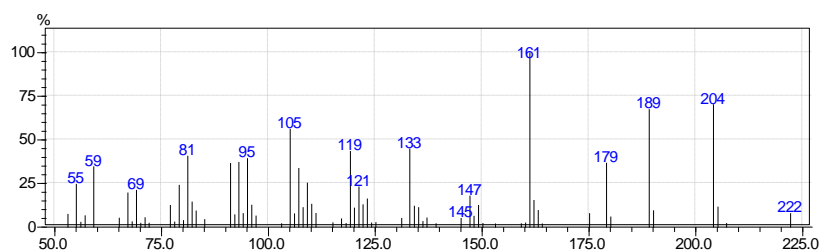

### 1-epi-Cubenol

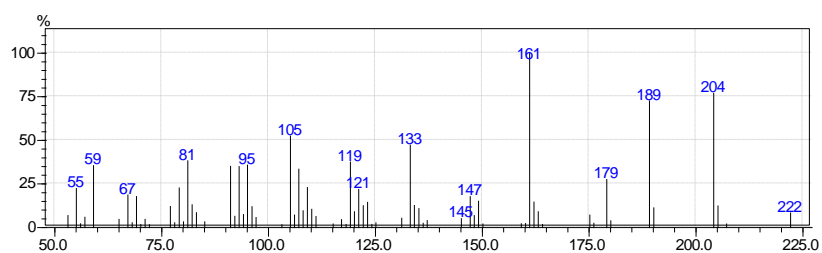

### $\alpha$ -acorenol

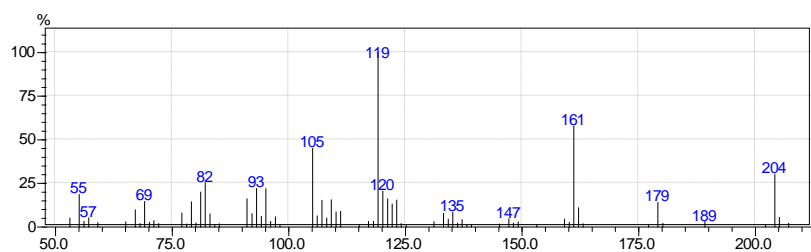

### epi- $\alpha$ -Cadinol

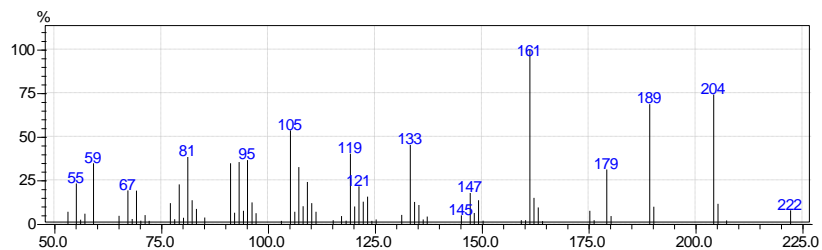

$\alpha$ -muurolol

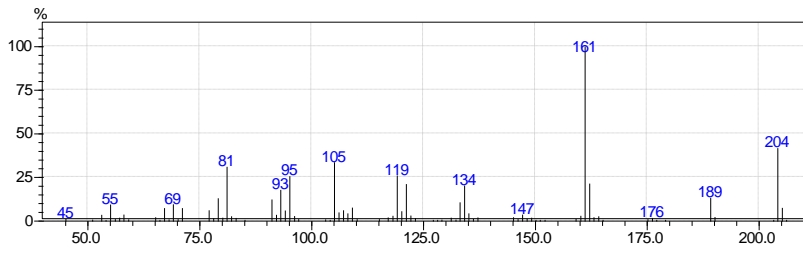

$\beta$ -Eudesmol

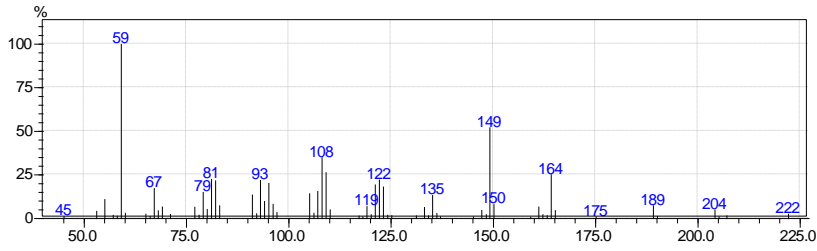

$\alpha$ -Cadinol

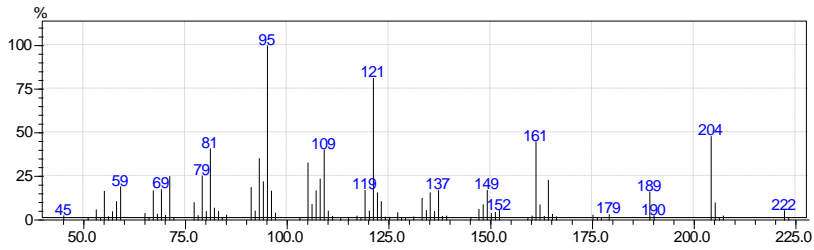

Valerianol

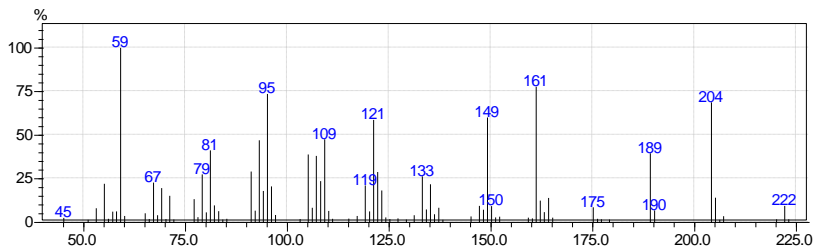

Allohimachalol

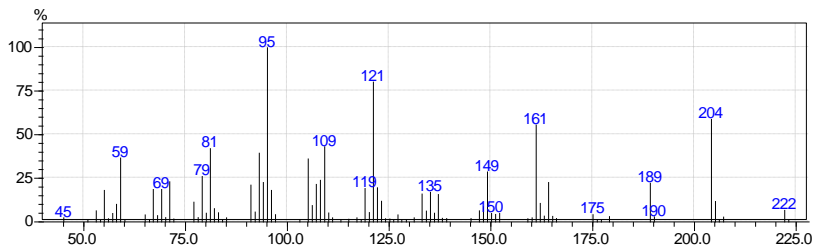

### 7-epi- $\alpha$ -Eudesmol

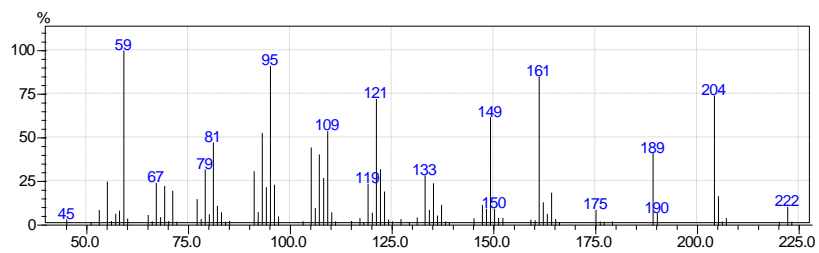

### Bulnesol

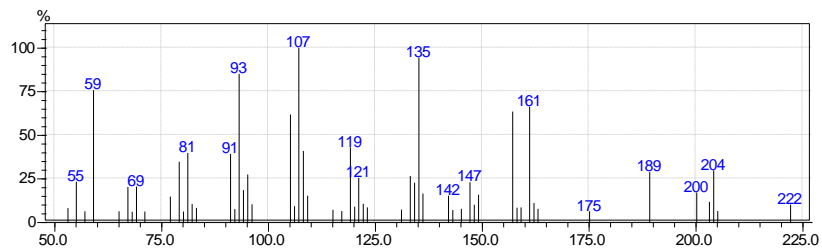

### Eudesm-7(11)-em-4-ol

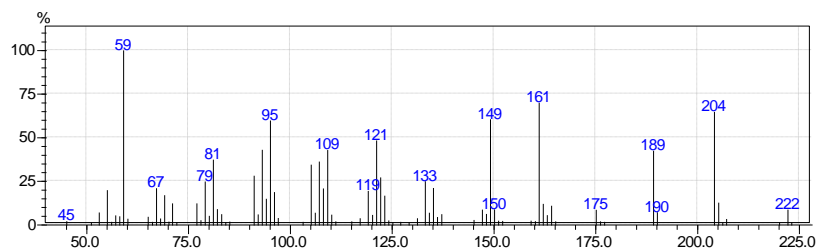

Supplement: pone.0157107.s001.pdf [file pone.0157107.s001.pdf]
