# Supplementary material for: Seed and peel essential oils obtained from Campomanesia adamantium fruit inhibit inflammatory and pain parameters in rodents
Source: PubMed Central journal article supplement (PMC5319778; doi:10.1371/journal.pone.0157107), 2017-02-21
Supplement: pone.0157107.s002.pdf [file pone.0157107.s002.pdf]

Undo | Clipboard | Analysis | Change | Import | Draw | Write | Text | Export | Print | Send | Help

Open Prism Help  
Enter search terms

|    | A          | B          | C          | D          | E          | F     | G     | H     | I     | J     | K     | L     |
|----|------------|------------|------------|------------|------------|-------|-------|-------|-------|-------|-------|-------|
|    | Data Set-A | Data Set-B | Data Set-C | Data Set-D | Data Set-E | Title | Title | Title | Title | Title | Title | Title |
|    | Y          | Y          | Y          | Y          | Y          | Y     | Y     | Y     | Y     | Y     | Y     | Y     |
| 1  | 0.10       | 1.93       | 1.10       | 1.18       | 0.1        |       |       |       |       |       |       |       |
| 2  | 0.00       | 1.74       | 1.23       | 1.10       | 0.2        |       |       |       |       |       |       |       |
| 3  | 0.10       | 1.82       | 1.16       | 0.92       | 0.1        |       |       |       |       |       |       |       |
| 4  | 0.00       | 2.21       | 1.14       | 0.84       | 0.2        |       |       |       |       |       |       |       |
| 5  | 0.10       | 2.10       | 1.20       | 0.86       | 0.2        |       |       |       |       |       |       |       |
| 6  |            |            |            |            |            |       |       |       |       |       |       |       |
| 7  |            |            |            |            |            |       |       |       |       |       |       |       |
| 8  |            |            |            |            |            |       |       |       |       |       |       |       |
| 9  |            |            |            |            |            |       |       |       |       |       |       |       |
| 10 |            |            |            |            |            |       |       |       |       |       |       |       |
| 11 |            |            |            |            |            |       |       |       |       |       |       |       |
| 12 |            |            |            |            |            |       |       |       |       |       |       |       |
| 13 |            |            |            |            |            |       |       |       |       |       |       |       |
| 14 |            |            |            |            |            |       |       |       |       |       |       |       |
| 15 |            |            |            |            |            |       |       |       |       |       |       |       |
| 16 |            |            |            |            |            |       |       |       |       |       |       |       |
| 17 |            |            |            |            |            |       |       |       |       |       |       |       |
| 18 |            |            |            |            |            |       |       |       |       |       |       |       |
| 19 |            |            |            |            |            |       |       |       |       |       |       |       |
| 20 |            |            |            |            |            |       |       |       |       |       |       |       |
| 21 |            |            |            |            |            |       |       |       |       |       |       |       |
| 22 |            |            |            |            |            |       |       |       |       |       |       |       |
| 23 |            |            |            |            |            |       |       |       |       |       |       |       |
| 24 |            |            |            |            |            |       |       |       |       |       |       |       |
