# Supplementary material for: Seed and peel essential oils obtained from Campomanesia adamantium fruit inhibit inflammatory and pain parameters in rodents
Source: PubMed Central journal article supplement (PMC5319778; doi:10.1371/journal.pone.0157107), 2017-02-21
Supplement: pone.0157107.s003.pdf [file pone.0157107.s003.pdf]

Undo | Clipboard | Analysis | Change | Import | Draw | Write | Text | Export | Print | Send | Help

Clipboard: Cut, Copy, Paste, Undo, Redo  
Analysis: Analyze  
Change: Change, Paste, Paste Special, Find, Replace  
Import: Import  
Draw: Draw  
Write: Write, Bold, Italic, Underline, Text Color, Background Color, Font Size, Font Style, Text Orientation, Text Alignment, Text Spacing, Text Indentation  
Text: Text, Font Color, Font Size, Font Style, Text Orientation, Text Alignment, Text Spacing, Text Indentation  
Export: Export  
Print: Print  
Send: Send  
Help: Open Prism Help, Enter search terms

|    | A          | B          | C          | D          | E     | F     | G     | H     | I     | J     |
|----|------------|------------|------------|------------|-------|-------|-------|-------|-------|-------|
|    | Data Set-A | Data Set-B | Data Set-C | Data Set-D | Title | Title | Title | Title | Title | Title |
|    | Y          | Y          | Y          | Y          | Y     | Y     | Y     | Y     | Y     | Y     |
| 1  | 0.72       | 0.5600     | 0.56       | 0.11       |       |       |       |       |       |       |
| 2  | 0.75       | 0.6400     | 0.54       | 0.12       |       |       |       |       |       |       |
| 3  | 0.86       | 0.7800     | 0.68       | 0.15       |       |       |       |       |       |       |
| 4  | 0.79       | 0.7400     | 0.65       | 0.10       |       |       |       |       |       |       |
| 5  | 0.82       | 0.6800     | 0.76       | 0.09       |       |       |       |       |       |       |
| 6  |            |            |            |            |       |       |       |       |       |       |
| 7  |            |            |            |            |       |       |       |       |       |       |
| 8  |            |            |            |            |       |       |       |       |       |       |
| 9  |            |            |            |            |       |       |       |       |       |       |
| 10 |            |            |            |            |       |       |       |       |       |       |
| 11 |            |            |            |            |       |       |       |       |       |       |
| 12 |            |            |            |            |       |       |       |       |       |       |
| 13 |            |            |            |            |       |       |       |       |       |       |
| 14 |            |            |            |            |       |       |       |       |       |       |
| 15 |            |            |            |            |       |       |       |       |       |       |
| 16 |            |            |            |            |       |       |       |       |       |       |
| 17 |            |            |            |            |       |       |       |       |       |       |
| 18 |            |            |            |            |       |       |       |       |       |       |
| 19 |            |            |            |            |       |       |       |       |       |       |
| 20 |            |            |            |            |       |       |       |       |       |       |
| 21 |            |            |            |            |       |       |       |       |       |       |
| 22 |            |            |            |            |       |       |       |       |       |       |
| 23 |            |            |            |            |       |       |       |       |       |       |
| 24 |            |            |            |            |       |       |       |       |       |       |

One-way ANOVA data | Row CT, Column A | Selected: Rows 1, Columns 4
