# Supplementary material for: Seed and peel essential oils obtained from Campomanesia adamantium fruit inhibit inflammatory and pain parameters in rodents
Source: PubMed Central journal article supplement (PMC5319778; doi:10.1371/journal.pone.0157107), 2017-02-21
Supplement: pone.0157107.s004.pdf [file pone.0157107.s004.pdf]

Undo | Clipboard | Analysis | Change | Import | Draw | Write | Text | Export | Print | Send | Help

Clipboard: Cut, Copy, Paste, Paste as Text Only, Paste as Text with Source Formatting, Paste as Text without Source Formatting, Paste as Text with Source Formatting and Linking

Analysis: Analyze

Change: Change Cell Color, Change Cell Color Range, Change Cell Color Range by Value, Change Cell Color Range by Formula, Change Cell Color Range by Text

Import: Import Text, Import XML

Draw: Fill Color, Fill Color Range, Fill Color Range by Value, Fill Color Range by Formula, Fill Color Range by Text

Write: Bold, Italic, Underline, Text Color, Text Color Range, Text Color Range by Value, Text Color Range by Formula, Text Color Range by Text, Text Background Color, Text Background Color Range, Text Background Color Range by Value, Text Background Color Range by Formula, Text Background Color Range by Text

Text: Font Face, Font Size, Bold, Italic, Underline, Text Color, Text Color Range, Text Color Range by Value, Text Color Range by Formula, Text Color Range by Text, Text Background Color, Text Background Color Range, Text Background Color Range by Value, Text Background Color Range by Formula, Text Background Color Range by Text

Export: Export to PDF, Export to HTML, Export to XML

Print: Print, Print Range, Print Selection

Send: Send to Mail, Send to OneNote, Send to PowerPoint, Send to Word

Help: Open Prism Help, Enter search terms

|    | A          | B          | C          | D          | E     | F     | G     | H     | I     | J     | K     | L     |
|----|------------|------------|------------|------------|-------|-------|-------|-------|-------|-------|-------|-------|
|    | Data Set-A | Data Set-B | Data Set-C | Data Set-D | Title | Title | Title | Title | Title | Title | Title | Title |
|    | Y          | Y          | Y          | Y          | Y     | Y     | Y     | Y     | Y     | Y     | Y     | Y     |
| 1  | 0.72       | 0.35       | 0.360      | 0.11       |       |       |       |       |       |       |       |       |
| 2  | 0.75       | 0.39       | 0.370      | 0.12       |       |       |       |       |       |       |       |       |
| 3  | 0.86       | 0.40       | 0.390      | 0.15       |       |       |       |       |       |       |       |       |
| 4  | 0.79       | 0.34       | 0.330      | 0.10       |       |       |       |       |       |       |       |       |
| 5  | 0.82       | 0.44       | 0.420      | 0.09       |       |       |       |       |       |       |       |       |
| 6  |            |            |            |            |       |       |       |       |       |       |       |       |
| 7  |            |            |            |            |       |       |       |       |       |       |       |       |
| 8  |            |            |            |            |       |       |       |       |       |       |       |       |
| 9  |            |            |            |            |       |       |       |       |       |       |       |       |
| 10 |            |            |            |            |       |       |       |       |       |       |       |       |
| 11 |            |            |            |            |       |       |       |       |       |       |       |       |
| 12 |            |            |            |            |       |       |       |       |       |       |       |       |
| 13 |            |            |            |            |       |       |       |       |       |       |       |       |
| 14 |            |            |            |            |       |       |       |       |       |       |       |       |
| 15 |            |            |            |            |       |       |       |       |       |       |       |       |
| 16 |            |            |            |            |       |       |       |       |       |       |       |       |
| 17 |            |            |            |            |       |       |       |       |       |       |       |       |
| 18 |            |            |            |            |       |       |       |       |       |       |       |       |
| 19 |            |            |            |            |       |       |       |       |       |       |       |       |
| 20 |            |            |            |            |       |       |       |       |       |       |       |       |
| 21 |            |            |            |            |       |       |       |       |       |       |       |       |
| 22 |            |            |            |            |       |       |       |       |       |       |       |       |
| 23 |            |            |            |            |       |       |       |       |       |       |       |       |
| 24 |            |            |            |            |       |       |       |       |       |       |       |       |
