# Supplementary material for: Seed and peel essential oils obtained from Campomanesia adamantium fruit inhibit inflammatory and pain parameters in rodents
Source: PubMed Central journal article supplement (PMC5319778; doi:10.1371/journal.pone.0157107), 2017-02-21
Supplement: pone.0157107.s006.pdf [file pone.0157107.s006.pdf]

Undo | Clipboard | Analysis | Change | Import | Draw | Write | Text | Export | Print | Send | Help

Clipboard: Cut, Copy, Paste, Undo, Redo  
Analysis: Analyze  
Change: Change, Copy, Paste, Undo, Redo  
Import: Import  
Draw: Draw  
Write: Write,  $\alpha$   
Text: Text,  $A^A$ ,  $B$ ,  $I$ ,  $U$ ,  $X^2$ ,  $X_2$   
Export: Export  
Print: Print  
Send: Send  
Help: Open Prism Help, Enter search terms

|    | A          | B          | C          | D          | E     | F     | G     | H     | I     | J     | K     | L     |
|----|------------|------------|------------|------------|-------|-------|-------|-------|-------|-------|-------|-------|
|    | Data Set-A | Data Set-B | Data Set-C | Data Set-D | Title | Title | Title | Title | Title | Title | Title | Title |
|    | Y          | Y          | Y          | Y          | Y     | Y     | Y     | Y     | Y     | Y     | Y     | Y     |
| 1  | 0.64       | 0.35       | 0.32       | 0.10       |       |       |       |       |       |       |       |       |
| 2  | 0.51       | 0.38       | 0.22       | 0.10       |       |       |       |       |       |       |       |       |
| 3  | 0.62       | 0.30       | 0.23       | 0.11       |       |       |       |       |       |       |       |       |
| 4  | 0.62       | 0.21       | 0.20       | 0.08       |       |       |       |       |       |       |       |       |
| 5  | 0.53       | 0.34       | 0.20       | 0.08       |       |       |       |       |       |       |       |       |
| 6  |            |            |            |            |       |       |       |       |       |       |       |       |
| 7  |            |            |            |            |       |       |       |       |       |       |       |       |
| 8  |            |            |            |            |       |       |       |       |       |       |       |       |
| 9  |            |            |            |            |       |       |       |       |       |       |       |       |
| 10 |            |            |            |            |       |       |       |       |       |       |       |       |
| 11 |            |            |            |            |       |       |       |       |       |       |       |       |
| 12 |            |            |            |            |       |       |       |       |       |       |       |       |
| 13 |            |            |            |            |       |       |       |       |       |       |       |       |
| 14 |            |            |            |            |       |       |       |       |       |       |       |       |
| 15 |            |            |            |            |       |       |       |       |       |       |       |       |
| 16 |            |            |            |            |       |       |       |       |       |       |       |       |
| 17 |            |            |            |            |       |       |       |       |       |       |       |       |
| 18 |            |            |            |            |       |       |       |       |       |       |       |       |
| 19 |            |            |            |            |       |       |       |       |       |       |       |       |
| 20 |            |            |            |            |       |       |       |       |       |       |       |       |
| 21 |            |            |            |            |       |       |       |       |       |       |       |       |
| 22 |            |            |            |            |       |       |       |       |       |       |       |       |
| 23 |            |            |            |            |       |       |       |       |       |       |       |       |
| 24 |            |            |            |            |       |       |       |       |       |       |       |       |
