# Supplementary material for: Seed and peel essential oils obtained from Campomanesia adamantium fruit inhibit inflammatory and pain parameters in rodents
Source: PubMed Central journal article supplement (PMC5319778; doi:10.1371/journal.pone.0157107), 2017-02-21
Supplement: pone.0157107.s007.pdf [file pone.0157107.s007.pdf]

Undo | Clipboard | Analysis | Change | Import | Draw | Write | Text | Export | Print | Send | Help

Clipboard: Cut, Copy, Paste, Paste with Formulas, Paste with Styles, Paste with Values and Formulas, Paste with Values and Styles, Paste with Values

Analysis: Analyze

Change: Change Cell Color, Change Cell Background Color, Change Cell Text Color, Change Cell Text Background Color, Change Cell Text Color and Background Color, Change Cell Text Color and Background Color and Font Color, Change Cell Text Color and Background Color and Font Color and Font Size, Change Cell Text Color and Background Color and Font Color and Font Size and Font Style, Change Cell Text Color and Background Color and Font Color and Font Size and Font Style and Font Weight, Change Cell Text Color and Background Color and Font Color and Font Size and Font Style and Font Weight and Font Color

Import: Import Text, Import XML

Draw: Draw, Erase

Write: Write, Write with Formulas, Write with Styles, Write with Values and Formulas, Write with Values and Styles, Write with Values and Formulas and Styles, Write with Values and Formulas and Styles and Font Color, Write with Values and Formulas and Styles and Font Color and Font Size, Write with Values and Formulas and Styles and Font Color and Font Size and Font Style, Write with Values and Formulas and Styles and Font Color and Font Size and Font Style and Font Weight, Write with Values and Formulas and Styles and Font Color and Font Size and Font Style and Font Weight and Font Color

Text: Text, Bold, Italic, Underline, Text Color, Text Background Color, Text Color and Background Color, Text Color and Background Color and Font Color, Text Color and Background Color and Font Color and Font Size, Text Color and Background Color and Font Color and Font Size and Font Style, Text Color and Background Color and Font Color and Font Size and Font Style and Font Weight, Text Color and Background Color and Font Color and Font Size and Font Style and Font Weight and Font Color

Export: Export Text, Export XML

Print: Print, Print Range, Print Selection

Send: Send, Send to PDF, Send to Word, Send to PowerPoint

Help: Open Prism Help, Enter search terms

|    | A          | B          | C          | D          | E     | F     | G     | H     | I     | J     | K     | L     |
|----|------------|------------|------------|------------|-------|-------|-------|-------|-------|-------|-------|-------|
|    | Data Set-A | Data Set-B | Data Set-C | Data Set-D | Title | Title | Title | Title | Title | Title | Title | Title |
|    | Y          | Y          | Y          | Y          | Y     | Y     | Y     | Y     | Y     | Y     | Y     | Y     |
| 1  | 105        | 73         | 63         | 47         |       |       |       |       |       |       |       |       |
| 2  | 142        | 89         | 45         | 52         |       |       |       |       |       |       |       |       |
| 3  | 133        | 69         | 55         | 45         |       |       |       |       |       |       |       |       |
| 4  | 137        | 49         | 68         | 24         |       |       |       |       |       |       |       |       |
| 5  | 152        | 78         | 61         | 27         |       |       |       |       |       |       |       |       |
| 6  |            |            |            |            |       |       |       |       |       |       |       |       |
| 7  |            |            |            |            |       |       |       |       |       |       |       |       |
| 8  |            |            |            |            |       |       |       |       |       |       |       |       |
| 9  |            |            |            |            |       |       |       |       |       |       |       |       |
| 10 |            |            |            |            |       |       |       |       |       |       |       |       |
| 11 |            |            |            |            |       |       |       |       |       |       |       |       |
| 12 |            |            |            |            |       |       |       |       |       |       |       |       |
| 13 |            |            |            |            |       |       |       |       |       |       |       |       |
| 14 |            |            |            |            |       |       |       |       |       |       |       |       |
| 15 |            |            |            |            |       |       |       |       |       |       |       |       |
| 16 |            |            |            |            |       |       |       |       |       |       |       |       |
| 17 |            |            |            |            |       |       |       |       |       |       |       |       |
| 18 |            |            |            |            |       |       |       |       |       |       |       |       |
| 19 |            |            |            |            |       |       |       |       |       |       |       |       |
| 20 |            |            |            |            |       |       |       |       |       |       |       |       |
| 21 |            |            |            |            |       |       |       |       |       |       |       |       |
| 22 |            |            |            |            |       |       |       |       |       |       |       |       |
| 23 |            |            |            |            |       |       |       |       |       |       |       |       |
| 24 |            |            |            |            |       |       |       |       |       |       |       |       |
