# Supplementary material for: Seed and peel essential oils obtained from Campomanesia adamantium fruit inhibit inflammatory and pain parameters in rodents
Source: PubMed Central journal article supplement (PMC5319778; doi:10.1371/journal.pone.0157107), 2017-02-21
Supplement: pone.0157107.s009.pdf [file pone.0157107.s009.pdf]

Undo | Clipboard | Analysis | Change | Import | Draw | Write | Text | Export | Print | Send | Help

Clipboard: Cut, Copy, Paste, Undo, Redo  
Analysis: Analyze  
Change: Undo, Redo, Paste, Find, Replace, Insert, Delete, Bold, Italic, Underline, Text Color, Background Color, Font Size, Font Style, Font Color, Paragraph Style, Bullets, Numbering, Indent, Decrease Indent, Increase Indent, Decrease Spacing, Increase Spacing, Paragraph Spacing, Paragraph Style, Paragraph Spacing, Paragraph Style, Paragraph Spacing  
Import: Import XML  
Draw: Fill, Stroke, Text, Image, Table, Chart, Grid, Background, Border, Color, Font, Paragraph, Paragraph Spacing, Paragraph Style, Paragraph Spacing, Paragraph Style, Paragraph Spacing  
Write: Undo, Redo, Paste, Find, Replace, Insert, Delete, Bold, Italic, Underline, Text Color, Background Color, Font Size, Font Style, Font Color, Paragraph Style, Bullets, Numbering, Indent, Decrease Indent, Increase Indent, Decrease Spacing, Increase Spacing, Paragraph Spacing, Paragraph Style, Paragraph Spacing, Paragraph Style, Paragraph Spacing  
Text: Font Size, Font Style, Font Color, Paragraph Style, Bullets, Numbering, Indent, Decrease Indent, Increase Indent, Decrease Spacing, Increase Spacing, Paragraph Spacing, Paragraph Style, Paragraph Spacing, Paragraph Style, Paragraph Spacing  
Export: Export XML  
Print: Print  
Send: Send, Send to PDF, Send to Email, Send to Print, Send to Web, Send to Social Media  
Help: Open Prism Help, Enter search terms

|    | A          | B          | C          | D          | E     | F     | G     | H     | I     | J     |
|----|------------|------------|------------|------------|-------|-------|-------|-------|-------|-------|
|    | Data Set-A | Data Set-B | Data Set-C | Data Set-D | Title | Title | Title | Title | Title | Title |
|    | Y          | Y          | Y          | Y          | Y     | Y     | Y     | Y     | Y     | Y     |
| 1  | 12.00      | 7.00       | 8.00       | 0.00       |       |       |       |       |       |       |
| 2  | 15.00      | 10.00      | 9.00       | 0.00       |       |       |       |       |       |       |
| 3  | 12.00      | 10.00      | 8.00       | 0.00       |       |       |       |       |       |       |
| 4  | 15.00      | 8.00       | 7.00       | 5.00       |       |       |       |       |       |       |
| 5  | 15.00      | 7.00       | 9.00       | 0.00       |       |       |       |       |       |       |
| 6  |            |            |            |            |       |       |       |       |       |       |
| 7  |            |            |            |            |       |       |       |       |       |       |
| 8  |            |            |            |            |       |       |       |       |       |       |
| 9  |            |            |            |            |       |       |       |       |       |       |
| 10 |            |            |            |            |       |       |       |       |       |       |
| 11 |            |            |            |            |       |       |       |       |       |       |
| 12 |            |            |            |            |       |       |       |       |       |       |
| 13 |            |            |            |            |       |       |       |       |       |       |
| 14 |            |            |            |            |       |       |       |       |       |       |
| 15 |            |            |            |            |       |       |       |       |       |       |
| 16 |            |            |            |            |       |       |       |       |       |       |
| 17 |            |            |            |            |       |       |       |       |       |       |
| 18 |            |            |            |            |       |       |       |       |       |       |
| 19 |            |            |            |            |       |       |       |       |       |       |
| 20 |            |            |            |            |       |       |       |       |       |       |
| 21 |            |            |            |            |       |       |       |       |       |       |
| 22 |            |            |            |            |       |       |       |       |       |       |
| 23 |            |            |            |            |       |       |       |       |       |       |
| 24 |            |            |            |            |       |       |       |       |       |       |
