# Supplementary material for: Seed and peel essential oils obtained from Campomanesia adamantium fruit inhibit inflammatory and pain parameters in rodents
Source: PubMed Central journal article supplement (PMC5319778; doi:10.1371/journal.pone.0157107), 2017-02-21
Supplement: pone.0157107.s010.pdf [file pone.0157107.s010.pdf]

Undo | Clipboard | Analysis | Change | Import | Draw | Write | Text | Export | Print | Send | Help

Analyze |  $\frac{1}{x}$  |  $\sqrt{x}$  |  $\alpha$  | A A B I U  $x^2$   $x_2$  | TXT XML | | | Open Prism Help | Enter search terms

|    | A          | B          | C          | D          | E     | F     | G     | H     | I     | J     |
|----|------------|------------|------------|------------|-------|-------|-------|-------|-------|-------|
|    | Data Set-A | Data Set-B | Data Set-C | Data Set-D | Title | Title | Title | Title | Title | Title |
|    | Y          | Y          | Y          | Y          | Y     | Y     | Y     | Y     | Y     | Y     |
| 5  | 0.60       | 0.42       | 0.25       | 0.02       |       |       |       |       |       |       |
| 6  | 0.57       | 0.32       | 0.30       | 0.10       |       |       |       |       |       |       |
| 7  | 0.52       | 0.45       | 0.29       | 0.06       |       |       |       |       |       |       |
| 8  | 0.63       | 0.38       | 0.24       | 0.12       |       |       |       |       |       |       |
| 9  | 0.65       | 0.28       | 0.26       | 0.05       |       |       |       |       |       |       |
| 10 |            |            |            |            |       |       |       |       |       |       |
| 11 |            |            |            |            |       |       |       |       |       |       |
| 12 |            |            |            |            |       |       |       |       |       |       |
| 13 |            |            |            |            |       |       |       |       |       |       |
| 14 |            |            |            |            |       |       |       |       |       |       |
| 15 |            |            |            |            |       |       |       |       |       |       |
| 16 |            |            |            |            |       |       |       |       |       |       |
| 17 |            |            |            |            |       |       |       |       |       |       |
| 18 |            |            |            |            |       |       |       |       |       |       |
| 19 |            |            |            |            |       |       |       |       |       |       |
| 20 |            |            |            |            |       |       |       |       |       |       |
| 21 |            |            |            |            |       |       |       |       |       |       |
| 22 |            |            |            |            |       |       |       |       |       |       |
| 23 |            |            |            |            |       |       |       |       |       |       |
| 24 |            |            |            |            |       |       |       |       |       |       |

| B    | C |
|------|---|
| 0.42 |   |
| 0.32 |   |
| 0.45 |   |
| 0.38 |   |
| 0.28 |   |
